# Supplementary material
Source: PubMed Central journal article supplement (PMC6452681)
Supplement: pnas.1819801116.sapp.pdf [file pnas.1819801116.sapp.pdf]

*Supplemental Appendix For:*

Social cheating in a *Pseudomonas aeruginosa* quorum-sensing variant

Ruiyi Chen<sup>1</sup>, Eric Déziel<sup>2</sup>, Marie-Christine Groleau<sup>2</sup>, Amy L. Schaefer<sup>3</sup> & E. P. Greenberg<sup>1,3</sup>

<sup>1</sup>Integrative Microbiology Research Centre, South China Agricultural University, Guangzhou 510642, China, <sup>2</sup> Institut National de la Recherche Scientifique-Institut Armand-Frappier, Laval, Quebec, Canada H7V 1B7 & <sup>3</sup>Department of Microbiology, University of Washington, Seattle, WA 98195-7735

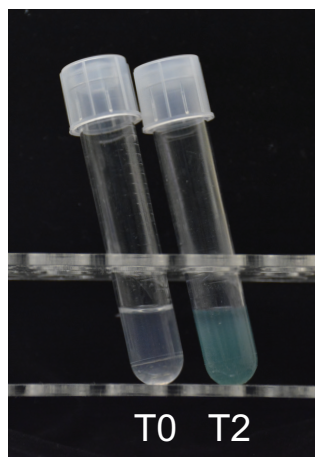

Figure S1. Growth of strain E80 in casein broth. Shown are images of casein broth cultures just after inoculation with E80 overnight culture in LB-MOPS (T0) and after approximately 2 days of growth (T2). At inoculation time the tube is clear, after 2-days growth the bacteria have proteolyzed and consumed the caseinate and the tube is turbid and blue green from production of pyocyanin during growth. When inoculation is conducted from well-developed casein broth culture to fresh casein broth, growth time is shortened to about 24 h.

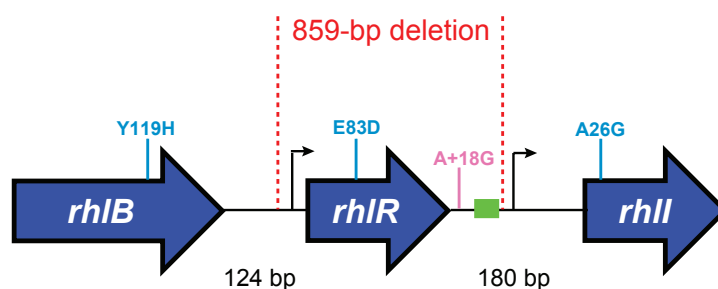

Figure S2. The *rhIRI* region of the chromosome in the E80 parent and RhIRI<sup>-</sup> mutant. A comparison of DNA sequences between E80 and PAO1 in the *rhIRI* region revealed several differences. Those sequence differences resulting in an amino acid change in the polypeptide are indicated in teal-colored text above the open reading frame (blue arrow); the single difference in non-coding DNA occurs 18 bases beyond the *rhIR* stop codon (pink-colored text). The 859-bp region lacking in the RhIRI<sup>-</sup> mutant is indicated by the red dashed lines. The deletion includes part of the *rhII* promoter and all of the LasR/RhIR-binding site (green box) required for full transcription of the *rhII* gene (1). The transcriptional start sites are indicated by black arrows (1, 2).

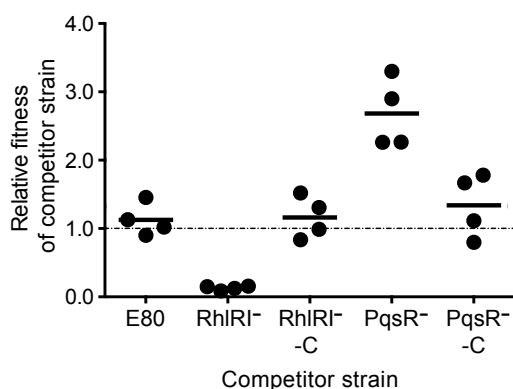

Figure S3. Competition of the PqsR mutant, the RhIRI mutant and the parent strain E80 in casein broth. Performing these experiments required some modifications as RhIRI and PqsR mutants cannot grow individually in casein broth and the E80 parent does not initially grow well in casein broth when inoculated from LB-grown cultures. In order to “jump start” these competitions, we included 100  $\mu$ l of cell-free supernatant fluid from a densely grown (48 h) E80 casein culture and all inocula were prepared from log-phase LB-MOPS cultures ( $OD_{600}$  0.8). The starting percentage of the competitors was 10%. Each symbol represents the competitive index of competitor strain against the parent strain (E80 or E80-Gm) after 24 h in casein broth; the solid lines represent means for each group. The outcomes above the dashed line indicate the competitor had a fitness advantage and below indicate the parent E80 had a fitness advantage. As in the LB-MOPS competitions (Fig. 5B), the RhIRI mutant was less fit than the parent and the PqsR<sup>-</sup> mutant was more fit than the parent.

Table S1. Strains used in this study

| Strain                      | Relevant characteristic(s) <sup>a</sup>                                                                                                                        | Source     |
|-----------------------------|----------------------------------------------------------------------------------------------------------------------------------------------------------------|------------|
| <b><i>P. aeruginosa</i></b> |                                                                                                                                                                |            |
| PAO1                        | Wildtype                                                                                                                                                       | (3)        |
| PAO1 LasR <sup>-</sup>      | PAO1 with an unmarked in-frame <i>lasR</i> deletion                                                                                                            | (4)        |
| PAO1 RhIR <sup>-</sup>      | PAO1 with an unmarked in-frame <i>rhIR</i> deletion                                                                                                            | (4)        |
| E80                         | Isolated from CF patient sputum, $\Delta$ 321-324 deletion in <i>lasR</i>                                                                                      | (5)        |
| E80-Gm                      | E80 with a gentamicin-resistance cassette at <i>att</i> site, Gen <sup>R</sup>                                                                                 | This work  |
| E80 RhIRI <sup>-</sup>      | E80 with an unmarked <i>rhIR</i> and P <sub>rhII</sub> deletion (see Fig. S2)                                                                                  | This work  |
| E80 RhIRI <sup>-</sup> -C   | E80 RhIRI <sup>-</sup> complemented with wildtype <i>rhIRI</i> at <i>att</i> site, Gen <sup>R</sup>                                                            | This work  |
| E80 PqsR <sup>-</sup>       | E80 with an unmarked <i>pqsR</i> deletion                                                                                                                      | This work  |
| E80 PqsR <sup>-</sup> -C    | PqsR <sup>-</sup> complemented with wildtype <i>pqsR</i> at <i>att</i> site, Gen <sup>R</sup>                                                                  | This work  |
| 1                           | Evolved E80 freeloader, $\Delta$ 371-374 deletion in <i>pqsR</i>                                                                                               | This work  |
| 2                           | Evolved E80 freeloader, $\Delta$ 109-121 deletion in <i>pqsR</i>                                                                                               | This work  |
| 3                           | Evolved E80 freeloader, T811G substitution in <i>pqsR</i>                                                                                                      | This work  |
| 4                           | Evolved E80 freeloader, C101T substitution in <i>pqsR</i>                                                                                                      | This work  |
| 5                           | Evolved E80 freeloader, wildtype <i>pqsR</i>                                                                                                                   | This work  |
| 6                           | Evolved E80 freeloader, wildtype <i>pqsR</i>                                                                                                                   | This work  |
| 1-C                         | Freeloader (E80) 1 complemented with wildtype <i>pqsR</i> at <i>att</i> site                                                                                   | This work  |
| 2-C                         | Freeloader (E80) 2 complemented with wildtype <i>pqsR</i> at <i>att</i> site                                                                                   | This work  |
| <b><i>E. coli</i></b>       |                                                                                                                                                                |            |
| DH5 $\alpha$                | <i>fhuA2</i> $\Delta$ ( <i>argF-lacZ</i> )U169 <i>phoA glnV44</i> $\Phi$ 80 $\Delta$ ( <i>lacZ</i> )M15 <i>gyrA96</i><br><i>recA1 relA1 endA1 thi-1 hsdR17</i> | Invitrogen |
| S17                         | <i>thi, pro, hdsR, hdsM+ recA</i> , RP4-2 (Tc::Mu Km::Tn7)                                                                                                     | (6)        |
| MG4                         | C4-HSL bioassay reporter strain; Amp <sup>R</sup>                                                                                                              | (7)        |
| pECP61.5                    |                                                                                                                                                                |            |
| HB101                       | Conjugal mating helper strain, Km <sup>R</sup>                                                                                                                 | (8)        |
| pRK2013                     |                                                                                                                                                                |            |

<sup>a</sup>Resistant to gentamicin (Gen<sup>R</sup>), ampicillin (Amp<sup>R</sup>) or kanamycin (Kan<sup>R</sup>)

Table S2. Plasmids and primers used in this study

| Plasmid or primer  | Relevant characteristic(s) <sup>a</sup>                                                                                                                                                | Source    |
|--------------------|----------------------------------------------------------------------------------------------------------------------------------------------------------------------------------------|-----------|
| <b>Plasmids</b>    |                                                                                                                                                                                        |           |
| pTNS2              | Source of transposase, Amp <sup>R</sup>                                                                                                                                                | (9)       |
| pFLP2              | Source of Flp recombinase, Amp <sup>R</sup> /Cb <sup>R</sup>                                                                                                                           | (9)       |
| pUC18-mini-Tn7T-Gm | mini-Tn7 chromosomal gene integration vector, Amp <sup>R</sup> /Gen <sup>R</sup>                                                                                                       | (9)       |
| pEXG2              | Suicide vector, Gen <sup>R</sup>                                                                                                                                                       | (10)      |
| pEXG2-rhIRI        | Plasmid for RhIRI-mutant strain construction (see Fig. S2), Gen <sup>R</sup>                                                                                                           | This work |
| pEXG2-pqsR         | Plasmid for PqsR-mutant strain construction (-90 to +730 bp), Gen <sup>R</sup>                                                                                                         | This work |
| Tn7-pqsR           | mini-Tn7 containing DNA from 255 upstream of the <i>pqsR</i> start codon to 136 bp downstream of the <i>pqsR</i> stop codon for complementation, Amp <sup>R</sup> /Gen <sup>R</sup>    | This work |
| Tn7-rhIRI          | mini-Tn7 containing DNA from 129 bp upstream of the <i>rhIR</i> start codon to 154 bp downstream of the <i>rhII</i> stop codon for complementation, Amp <sup>R</sup> /Gen <sup>R</sup> | This work |
| <b>Primers</b>     |                                                                                                                                                                                        |           |
| rhIRI-KO-UP-F      | 5'-ACGAACTGCAACGCTTTCT-3'                                                                                                                                                              | This work |
| rhIRI-KO-UP-R      | 5'-TCATGGCAACCCTATCTGTTAT-3'                                                                                                                                                           | This work |
| rhIRI-KO-DN-F      | 5'-CTCATGTGTGTGCTGGTATGT-3'                                                                                                                                                            | This work |
| rhIRI-KO-DN-R      | 5'-GTCGAACTGGTCGAATTCCT-3'                                                                                                                                                             | This work |
| pqsR-KO-UP-F       | 5'-GCCTGTACCAGGAGTCGTTCC-3'                                                                                                                                                            | This work |
| pqsR-KO-UP-R       | 5'-ACTGTGGAAGAAGCGTCGAG-3'                                                                                                                                                             | This work |
| pqsR-KO-DN-F       | 5'-TCAGCGAACTCTACGAACCG-3'                                                                                                                                                             | This work |
| pqsR-KO-DN-R       | 5'-GGCAACCTCGATACCAGCAT-3'                                                                                                                                                             | This work |
| rhIRI-Compl-F      | 5'-CCTGAACGGTGCTGGCATAACA-3'                                                                                                                                                           | This work |
| rhIRI-Compl-R      | 5'-GGACGAGATGGCGGAATGAC-3'                                                                                                                                                             | This work |
| pqsR-Compl-F       | 5'-TCACCTCCAAAACGACGACT-3'                                                                                                                                                             | This work |
| pqsR-Compl-R       | 5'-CGGAAGGTTTCGACTGCCTG-3'                                                                                                                                                             | This work |

<sup>a</sup>Resistant to ampicillin (Amp<sup>R</sup>), carbenicillin (Cb<sup>R</sup>), or gentamicin (Gen<sup>R</sup>)

## SUPPLEMENTAL REFERENCES

1. de Kievit, T. R., Kakai, Y., Register, J. K., Pesci, E. C. & Iglewski, B. H. (2002) Role of the *Pseudomonas aeruginosa las* and *rhlI* quorum-sensing systems in *rhlI* regulation. *FEMS Microbiol Lett* 18:101-106.
2. Wurtzel, O., Yoder-Himes, D. R., Han, K., Dandekar, A. A., Edelheit, S., Greenberg, E. P., Sorek, R. & Lory, S. (2012) The single-nucleotide resolution of *Pseudomonas aeruginosa* grown in body temperature. *PLoS Pathog* 8:e1002945.
3. Stover, C. K. & et al. (2000) Complete genome sequence of *Pseudomonas aeruginosa* PAO1, an opportunistic pathogen. *Nature* 406: 959-964.
4. Wang, M., Schaefer, A. L., Dandekar, A. A. & Greenberg, E. P. (2015) Quorum sensing and policing of *Pseudomonas aeruginosa* social cheaters. *Proc Natl Acad Sci USA* 112: 2187-2191.
5. Feltner, J. B., Wolter, D. J., Pope, C. E., Groleau, M. C., Smalley, N. E., Greenberg, E. P., Mayer-Hamblett, N., Burns, J., Deziel, E., Hoffman, L. R. & Dandekar, A. A. (2016) LasR variant cystic fibrosis isolates reveal an adaptable quorum-sensing hierarchy in *Pseudomonas aeruginosa*. *MBio* 4:01513-01516.
6. Simon, R., Priefer, U. & Puhler, A. (1983) A broad range mobilization system for in vivo engineering: transposon mutagenesis in gram negative bacteria. *Nature Biotechnol* 1: 784-791.
7. Pearson, J. P., Pesci, E. P. & Iglewski, B. H. (1997) Roles of *Pseudomonas aeruginosa las* and *rhl* quorum-sensing systems in control of elastase and rhamnolipid biosynthesis genes. *J Bacteriol* 179: 5756-5767.
8. Figurski, D. & Helinski, D. R. (1979) Replication of an origin-containing derivative of plasmid RK2 dependent on a plasmid function provided *in trans*. *Proc Natl Acad Sci USA* 76:1648-1652.
9. Choi, K.-H. & Schweizer, H. P. (2006) mini-Tn7 insertion in bacteria with single attTn7 sites: example *Pseudomonas aeruginosa*. *Nat Protocols* 1:153-161.
10. Rietsch, A., Vallet-Gely, I., Dove, S. L. & Mekalanos, J. J. (2005) ExsE, a secreted regulator of type III secretion genes in *Pseudomonas aeruginosa*. *Proc Natl Acad Sci USA* 102: 8006-8011.
